# Supplementary material for: Core–shell InN/PM6 Z-scheme heterojunction photoanodes for efficient and stable photoelectrochemical water splitting
Source: Royal Society of Chemistry journal article supplement (doi:10.1039/d3ta04656g), 2023-01-01
Supplement: d3ta04656g1.pdf [file d3ta04656g1.pdf]

## Supporting Information

# **Core-Shell InN/PM6 Z-scheme Heterojunction Photoanodes for Efficient and Stable Photoelectrochemical Water Splitting**

Shaohua Xie,<sup>a,b</sup> Jiehui Liang,<sup>a,b,c</sup> Qianhu Liu,<sup>a,b,c</sup> Peixin Liu,<sup>a,b</sup> Junkun Wang,<sup>a,b,c</sup> Jiayi Li,<sup>a,b</sup>  
Haoyang Wu,<sup>a,b</sup> Wenliang Wang<sup>a,b,\*</sup> and Guoqiang Li<sup>a,b,c,d,\*</sup>

<sup>a</sup> State Key Laboratory of Luminescent Materials and Devices, South China University of Technology, Guangzhou 510640, China.

<sup>b</sup> Department of Electronic Materials, School of Materials Science and Engineering, South China University of Technology, Guangzhou 510640, China.

<sup>c</sup> School of Physics and Optoelectronics, South China University of Technology, Guangzhou 510640, China.

<sup>d</sup> Guangdong Choicore Optoelectronics Co., Ltd., Heyuan 517003, China

\* Corresponding author, E-mail: wenliangwang@scut.edu.cn and msgli@scut.edu.cn

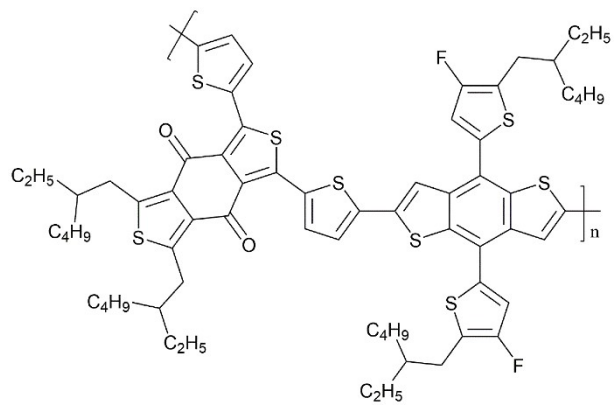

**Fig. S1.** Chemical structures of PM6.

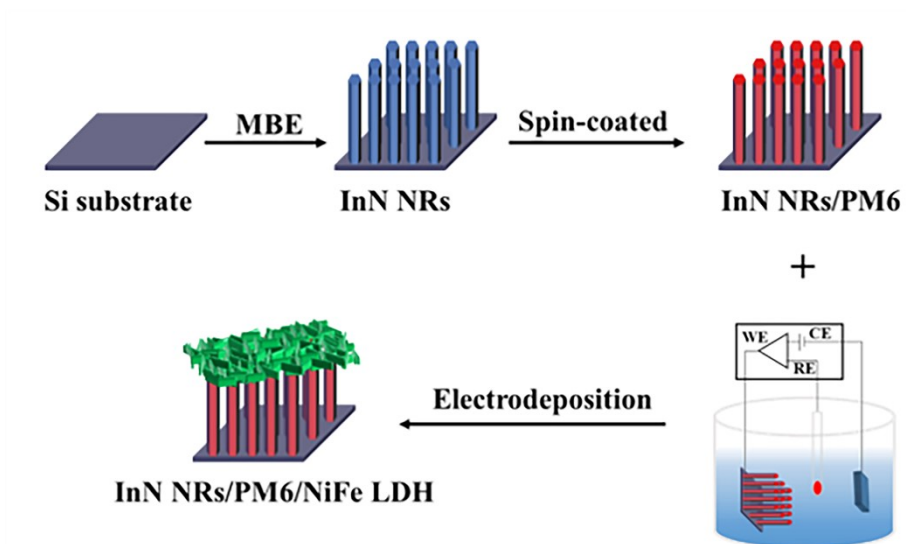

**Fig. S2.** Schematic diagram for the preparation of the InN/PM6/NiFe LDH photoelectrode.

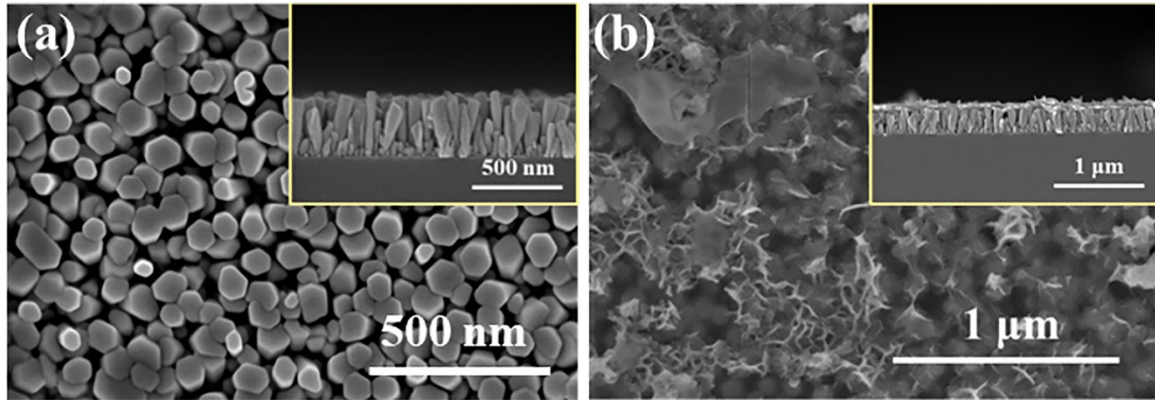

**Fig. S3.** The top view of SEM image of (a) InN NRs and (b) InN/PM6/NiFe LDH photoelectrode. The inset is the corresponding side view of SEM image.

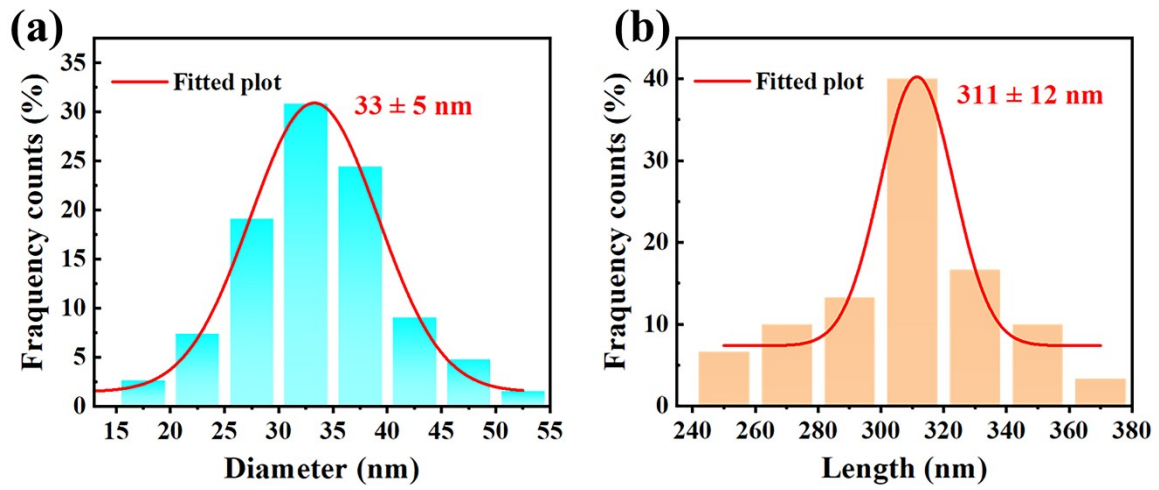

**Fig. S4.** The diameter (a) and length distribution (b) of the InN NRs.

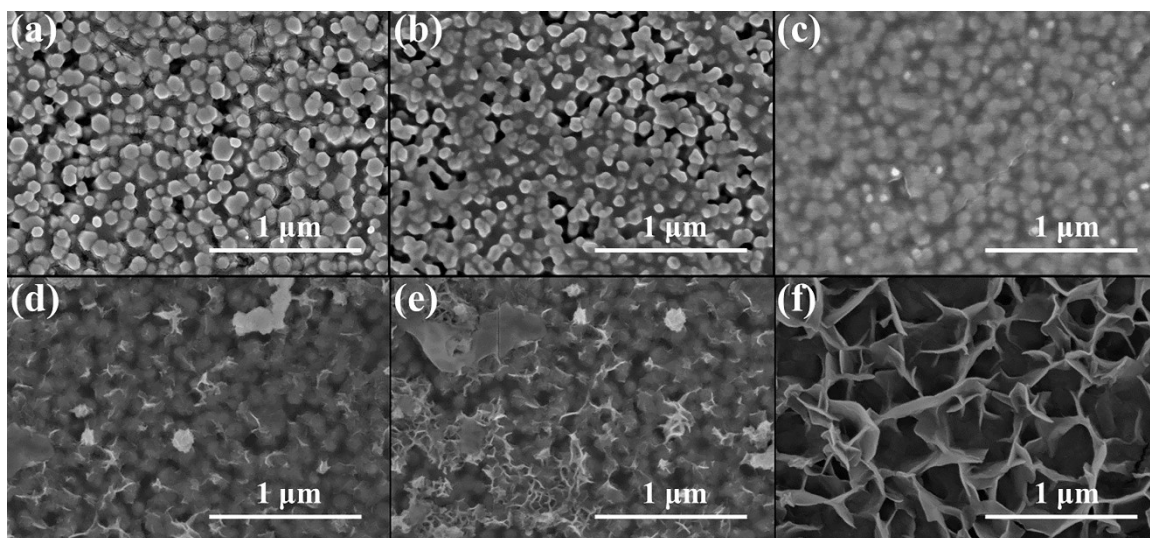

**Fig. S5.** (a-c) The top-view SEM images of InN/PM6-3000, InN/PM6-4000, and InN/PM6-5000. (d-f) The top-view SEM images of InN/PM6/NiFe LDH-60, InN/PM6/NiFe LDH-120, and InN/PM6/NiFe LDH-180.

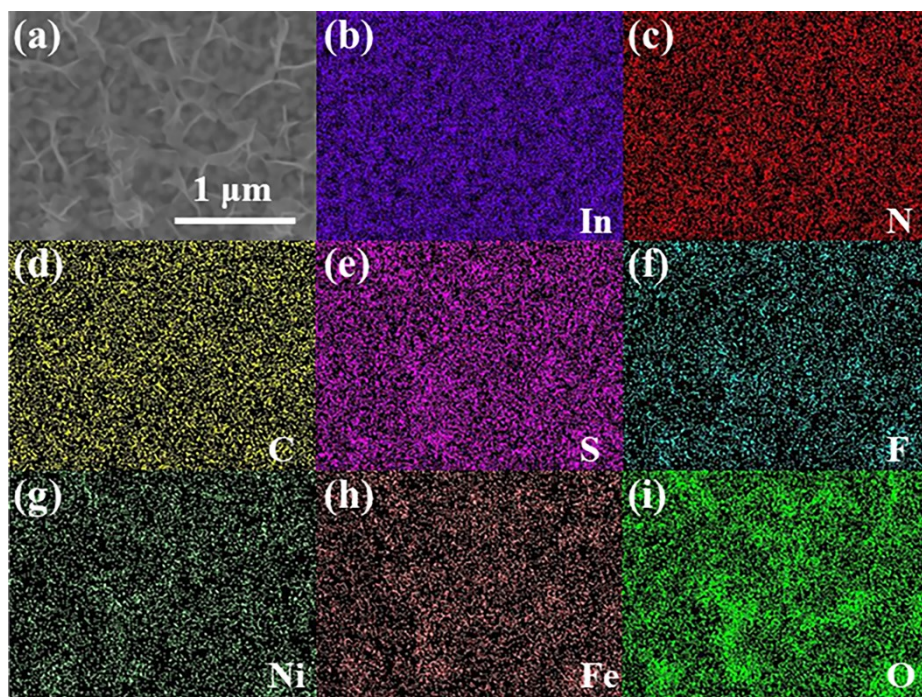

**Fig. S6.** (a) SEM top view images and (b-i) the corresponding elemental mapping images of the InN/PM6/NiFe LDH photoelectrode.

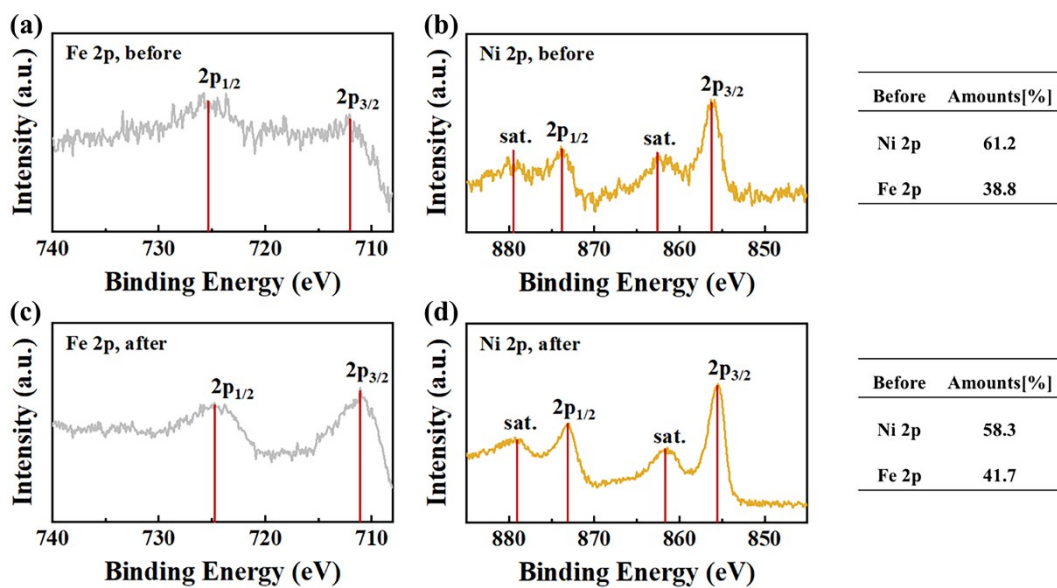

**Fig. S7.** XPS characterization of the InN/PM6/NiFe LDH photoelectrode before and after the PEC test and changes in Ni and Fe amounts. (a), (c) Fe 2p and (b), (d) Ni 2p XPS spectrum of the InN/PM6/NiFe LDH before and after the PEC test.



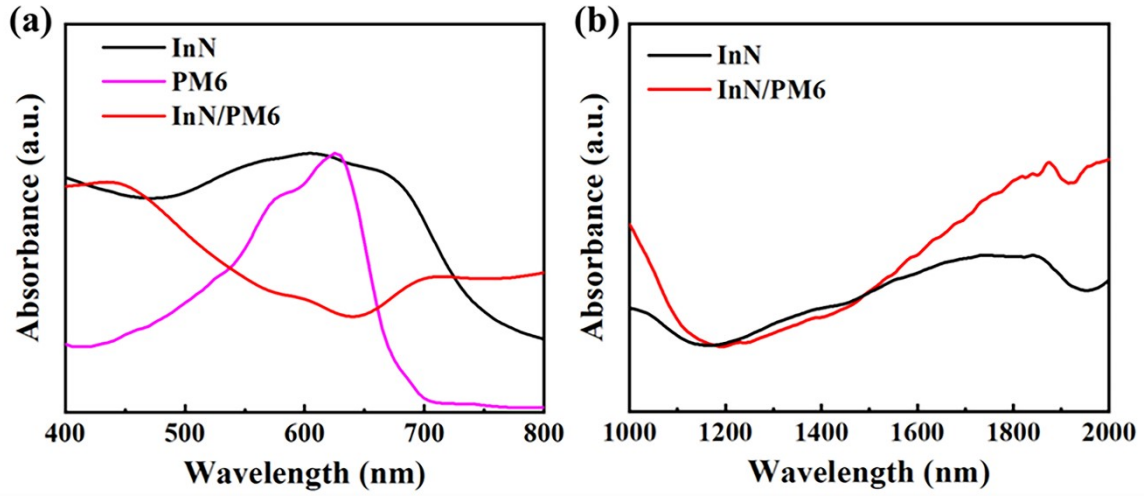

**Fig. S8.** (a) UV-vis absorption spectroscopy of bare InN NRs, PM6, and InN/PM6 in the visible light region, (b) bare InN NRs and InN/PM6 in the infrared region.

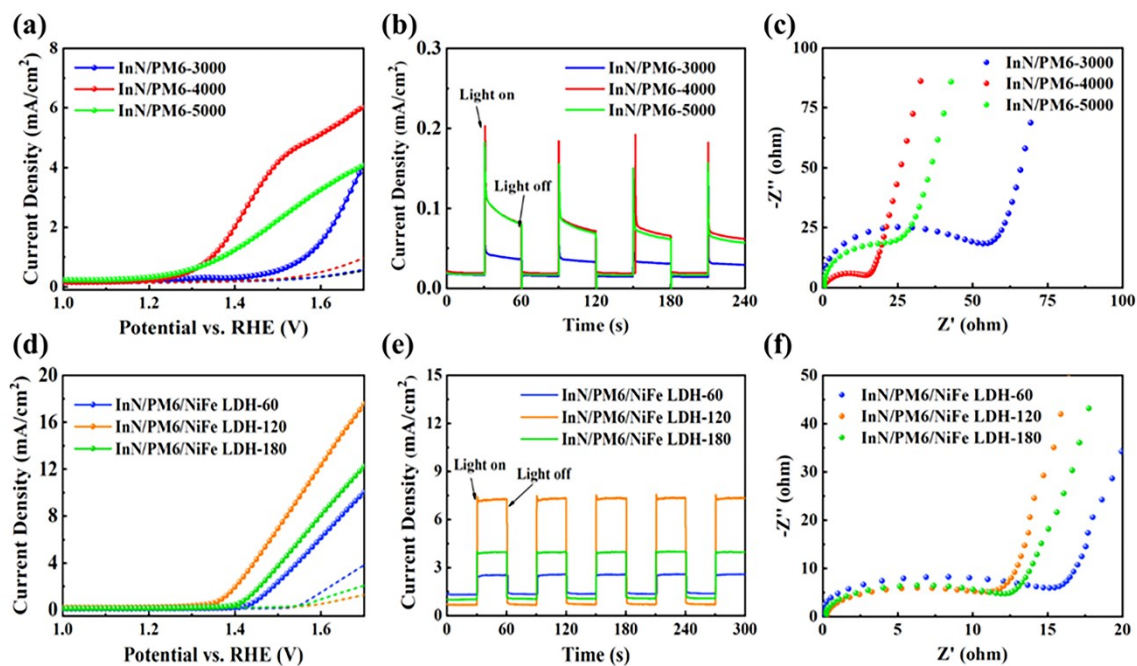

**Fig. S9.** PEC properties of InN-based photoanode. LSV curves of (a) the InN/PM6 and (d) InN/PM6/NiFe LDH photoanode in 0.1 M KOH solution (pH 13) under 1 sun illumination, Transient photocurrent curves of (b) the InN/PM6 and (e) InN/PM6/NiFe LDH photoanode at 1.45 V vs. RHE, EIS spectra of (c) the InN/PM6 and (f) InN/PM6/NiFe LDH photoanode at 1.2 V vs. RHE.

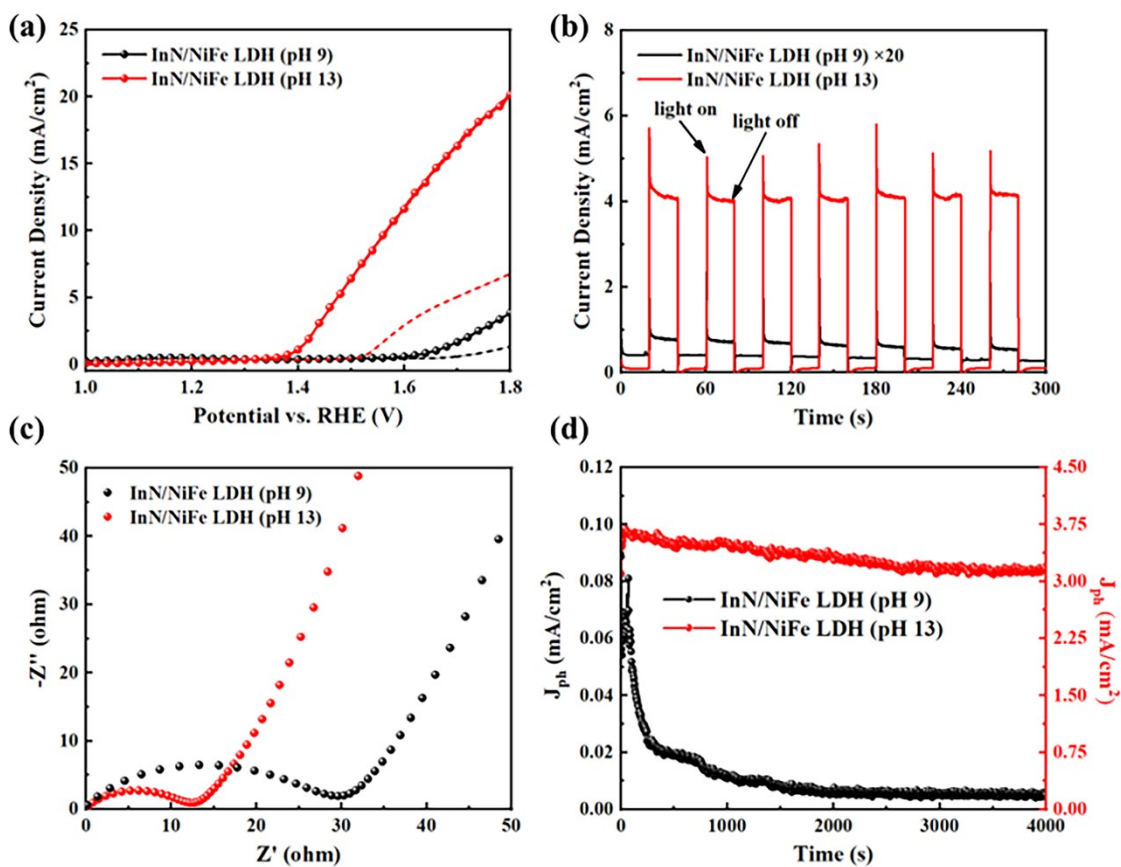

**Fig. S10.** (a) LSV curves of the InN/NiFe LDH photoanode in 0.2 M Na<sub>2</sub>HPO<sub>4</sub> solution (pH 9) and 0.1 M KOH solution (pH 13) under 1 sun illumination. (b) Transient photocurrent curves of the InN/NiFe LDH photoanode at 1.45 V vs. RHE, (c) EIS spectra of the InN/NiFe LDH photoanode at 1.2 V vs. RHE, (d) the J-t curves of the InN/NiFe LDH photoanode in the different pH value of electrolytes at 1.45 V vs. RHE.

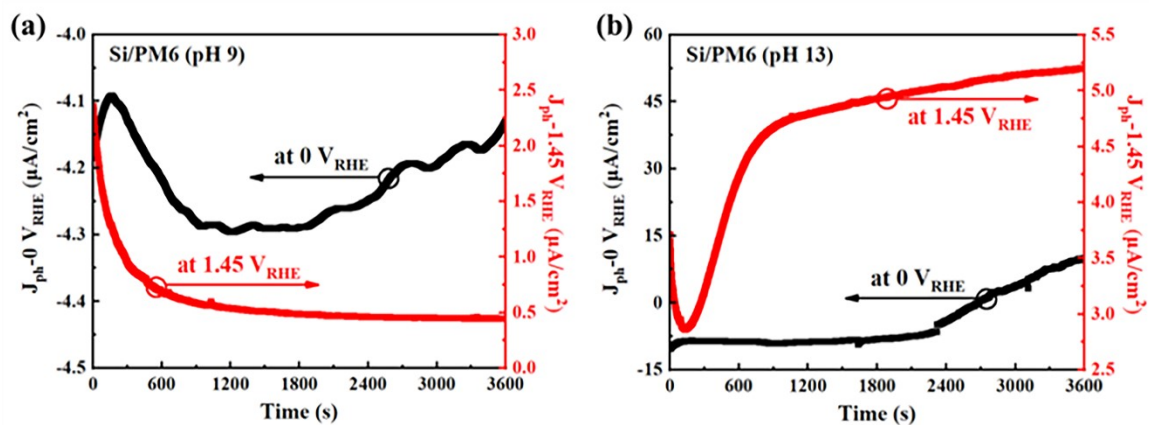

**Fig. S11.** J-t curves of Si/PM6 photoanodes at 0 V vs. RHE and 1.45 V vs. RHE under 1 sun illumination in 0.2 M Na<sub>2</sub>HPO<sub>4</sub> solution (pH 9) and 0.1 M KOH solution (pH 13).

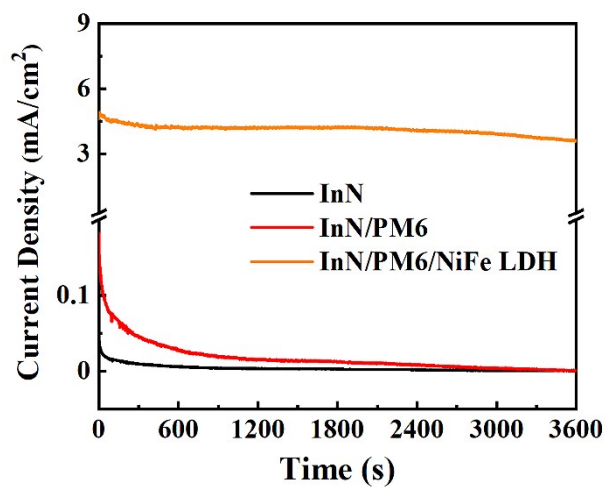

**Fig. S12.** J-t curves of InN-based photoanodes at 1.45 V vs. RHE under 1 sun illumination in 0.1 M KOH solution (pH 13).

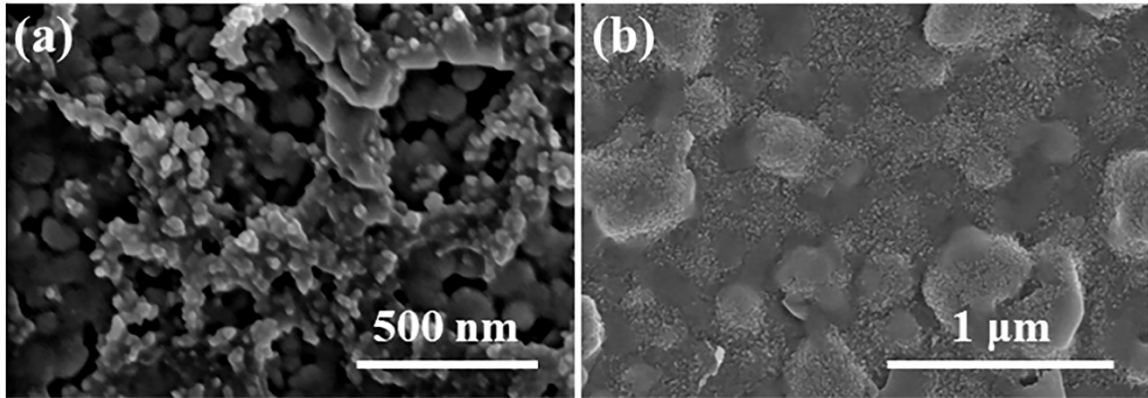

**Fig. S13.** SEM image of (a) InN/PM6 and (b) InN/PM6/NiFe LDH photoanode after illumination under three-electrodes system.

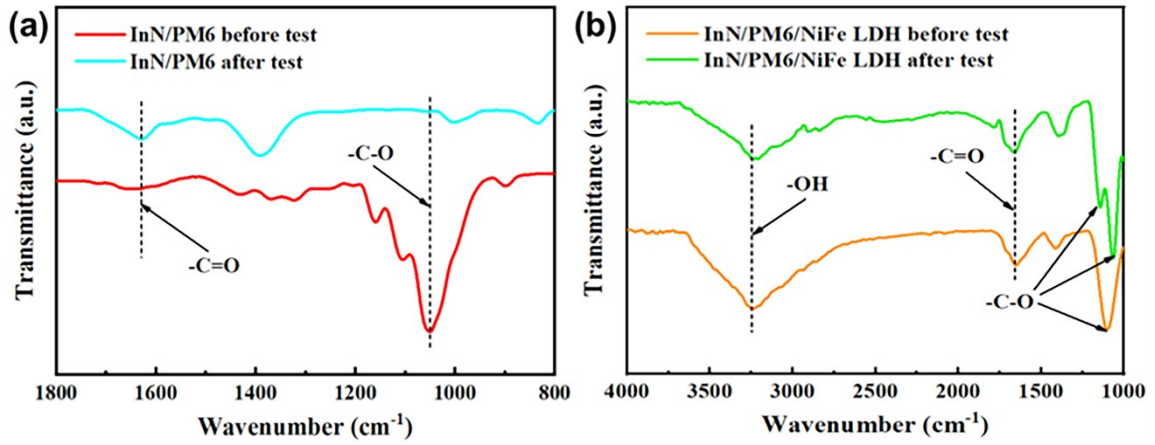

**Fig. S14.** FT-IR spectrum of (a) InN/PM6 and (b) InN/PM6/NiFe LDH photoanode before and after PEC testing.

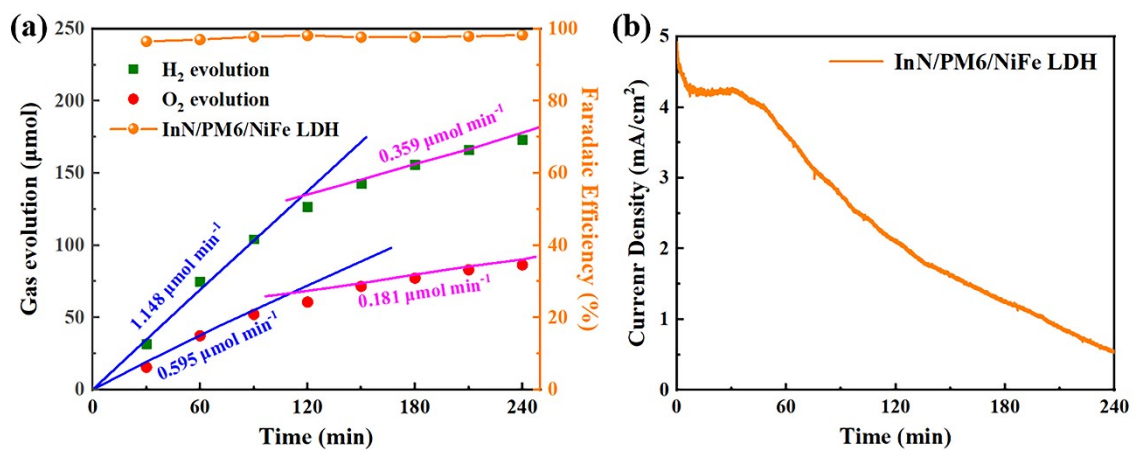

**Fig. S15.** (a) Gas evolution curves and faradaic efficiency measured under AM 1.5G continuous illumination (b) J-t curves of InN/PM6/NiFe LDH photoanode at 1.45 V vs. RHE under 1 sun illumination in 0.1 M KOH solution (pH 13) for 4 h.



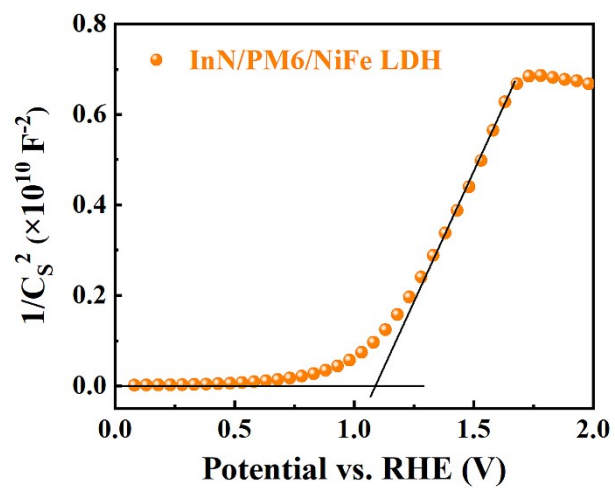

**Fig. S16.** M-S plots of the InN/PM6/NiFe LDH heterojunction measured in the dark.

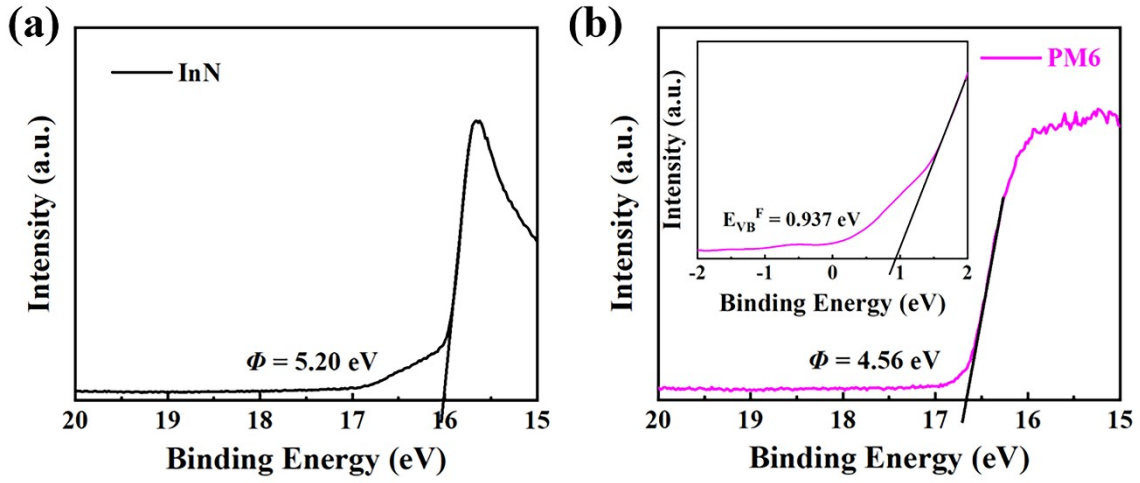

Fig.

S17. UPS spectra of (a) InN and (b) PM6. The inset is the corresponding  $E_{VB}^F$  of PM6.

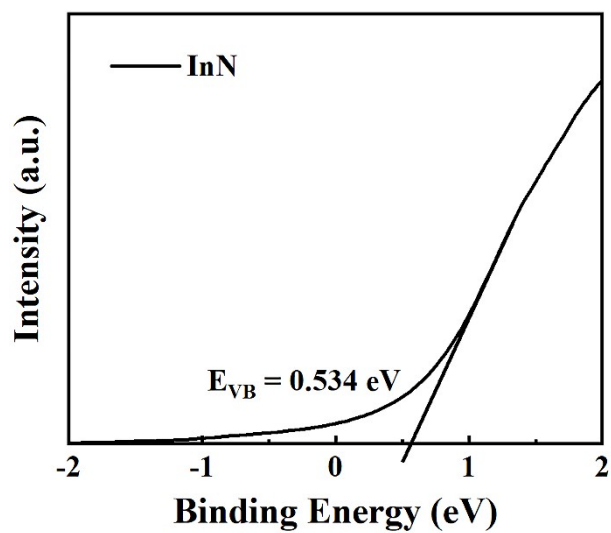

**Fig. S18.** XPS valence band spectra of the bare InN NRs.

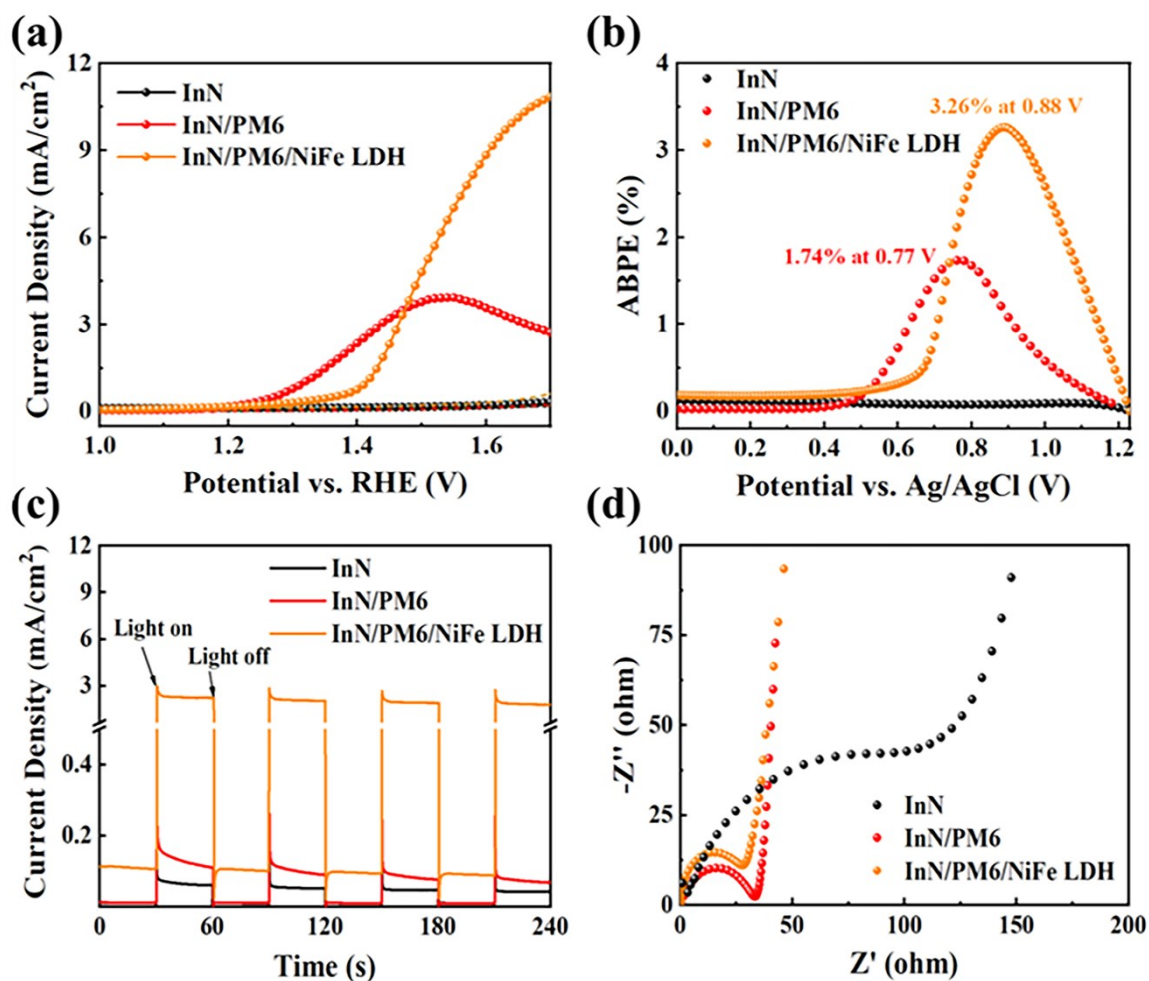

**Fig. S19.** PEC properties of InN-based photoanode. (a) LSV curves and (b) ABPE curves of the pristine InN NRs, InN/PM6, and InN/PM6/NiFe LDH photoanodes in 0.2 M Na<sub>2</sub>HPO<sub>4</sub> solution (pH 9) under 1 sun illumination, (c) Transient photocurrent curves of the different photoanodes at 1.45 V vs. RHE, (d) EIS spectra of all photoanodes at 1.2 V vs. RHE.

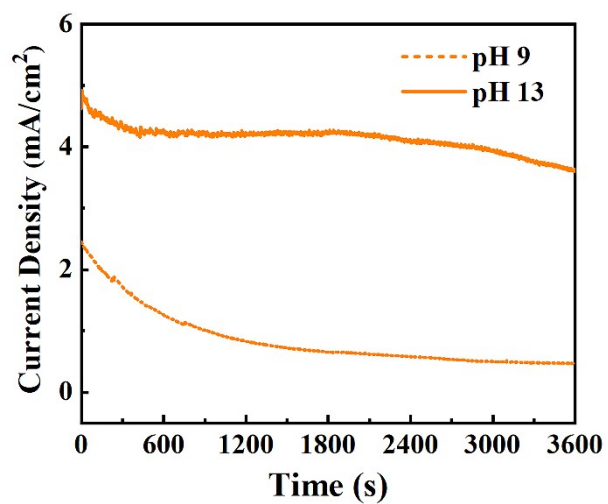

**Fig. S20.** Chronoamperometry curves of the InN/PM6/NiFe LDH photoanode at 1.45 V vs. RHE under 1 sun illumination in 0.2 M Na<sub>2</sub>HPO<sub>4</sub> solution (pH 9) and 0.1 M KOH solution (pH 13).

**Table 1.** Summary of the PEC performance of InN-based photoanodes under illumination of 100 mW cm<sup>-2</sup> with AM 1.5G filter.

| Photoanode                          | Electrolyte                           | Photocurrent density                                | Reference         |
|-------------------------------------|---------------------------------------|-----------------------------------------------------|-------------------|
| InN NRs/PM6                         | 0.1 M KOH                             | 3.21 mA cm <sup>-2</sup> at 1.45 V <sub>RHE</sub>   | This work         |
| InN NRs/PM6/NiFe LDH                | 0.1 M KOH                             | 4.82 mA cm <sup>-2</sup> at 1.45 V <sub>RHE</sub>   | This work         |
| InN NRs/NiFe LDH                    | 0.1 M KOH                             | 3.64 mA cm <sup>-2</sup> at 1.45 V <sub>RHE</sub>   | This work         |
| InN NW/Si                           | 1 M NaOH                              | 0.06 mA cm <sup>-2</sup> at 1.2 V <sub>RHE</sub>    | Ref. <sup>1</sup> |
| In <sub>2</sub> O <sub>3</sub> /InN | 0.1 M PBS                             | 0.795 mA cm <sup>-2</sup> at 1 V <sub>Ag/AgCl</sub> | Ref. <sup>2</sup> |
| In <sub>2</sub> O <sub>3</sub> /InN | 0.1 M PBS                             | 0.966 mA cm <sup>-2</sup> at 1 V <sub>Ag/AgCl</sub> | Ref. <sup>3</sup> |
| InN/ZnO                             | 0.1 M Na <sub>2</sub> SO <sub>4</sub> | 0.02 mA cm <sup>-2</sup> at 1.4 V <sub>RHE</sub>    | Ref. <sup>4</sup> |
| ZnO: InN                            | 0.5 M Na <sub>2</sub> SO <sub>4</sub> | 0.015 mA cm <sup>-2</sup> at 1 V <sub>Ag/AgCl</sub> | Ref. <sup>5</sup> |
| Al-rich InAlN                       | 0.1 M PBS                             | 1.2 mA cm <sup>-2</sup> at 1 V <sub>Ag/AgCl</sub>   | Ref. <sup>6</sup> |

---

**Table S2.** The energy band parameters of all photoelectrodes obtained from the UPS and XPS valence band spectra.

| <b>Photoelectrodes</b> | <b><math>E_{\text{VBM}}/E_{\text{HOMO}}</math> (eV)</b> | <b><math>E_{\text{CBM}}/E_{\text{LUMO}}</math> (eV)</b> | <b><math>E_{\text{g}}</math> (eV)</b> |
|------------------------|---------------------------------------------------------|---------------------------------------------------------|---------------------------------------|
| <b>InN NRs</b>         | <b>-5.734</b>                                           | <b>-5.094</b>                                           | <b>0.64</b>                           |
| <b>PM6</b>             | <b>-5.497</b>                                           | <b>-3.677</b>                                           | <b>1.82</b>                           |

---

## References

- 1 J. Kamimura, P. Bogdanoff, M. Ramsteiner, L. Geelhaar and H. Riechert, *Semicond. Sci. Technol.*, 2016, **31**, 6.
- 2 A. Saroni, S. A. Rahman and B. T. Goh, *7th Asian Conference on Colloid and Interface Science (ACCIS)*, 2017, **5**, S186-S190.
- 3 A. Saroni, M. Alizadeh, S. A. Rahman, W. Meevasana and B. T. Goh, *J. Power Sources*, 2020, **480**, 10.
- 4 H. Q. Liu, X. Z. Ma, Z. X. Chen, Q. G. Li, Z. Y. Lin, H. Liu, L. Y. Zhao and S. Chu, *Small*, 2018, **14**, 9.
- 5 S. S. Menon, H. Y. Hafeez, B. Gupta, K. Baskar, G. Bhalerao, S. Hussain, B. Neppolian and S. Singh, *Renewable Energy*, 2019, **141**, 760-769.
- 6 M. Alizadeh, G. B. Tong, M. S. Mehmood, K. W. Qader, S. A. Rahman and B. Shokri, *Sol. Energy Mater. Sol. Cells*, 2018, **185**, 445-455.
